# Supplementary material
Source: PubMed Central journal article supplement (PMC3577097)

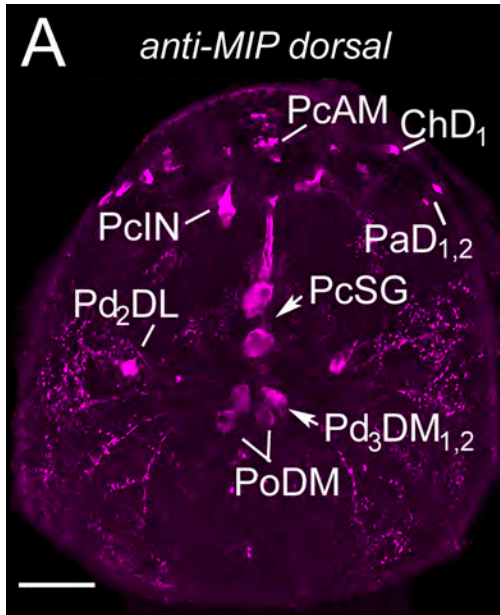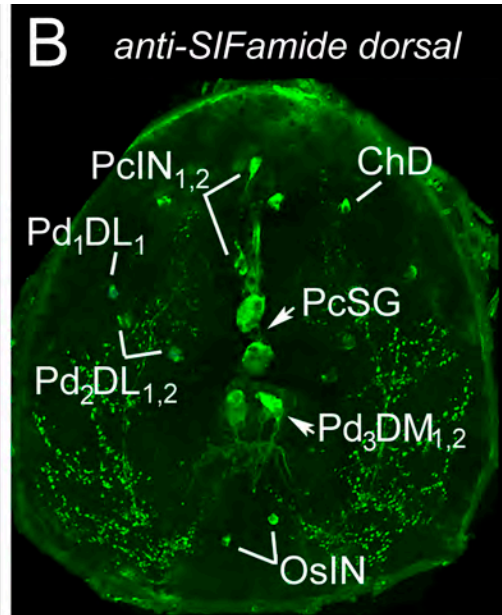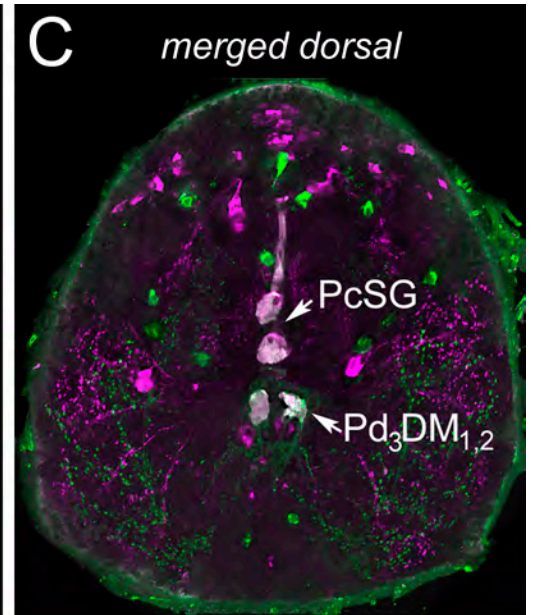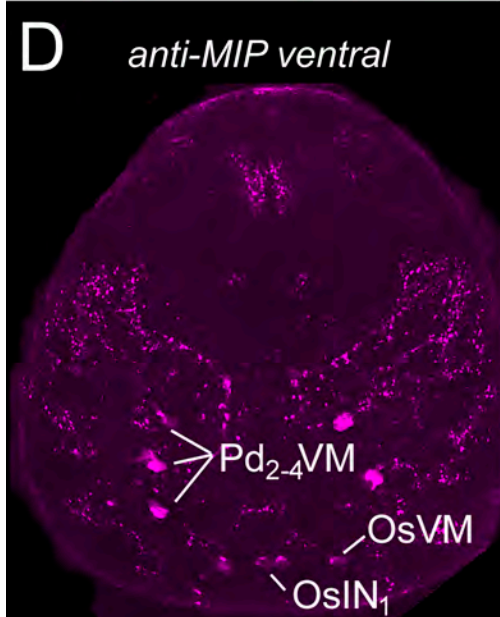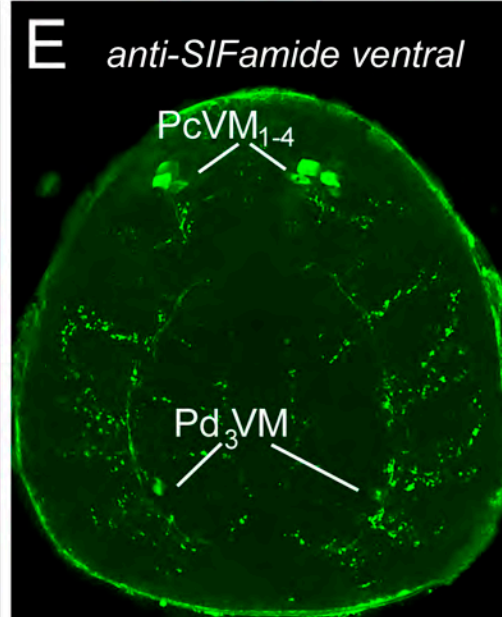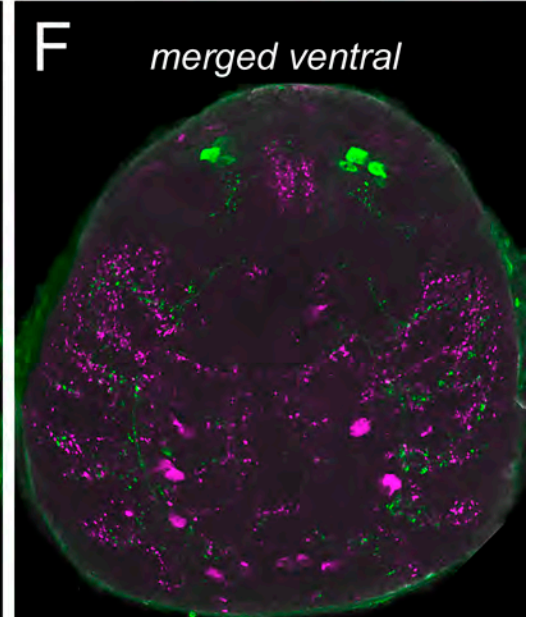

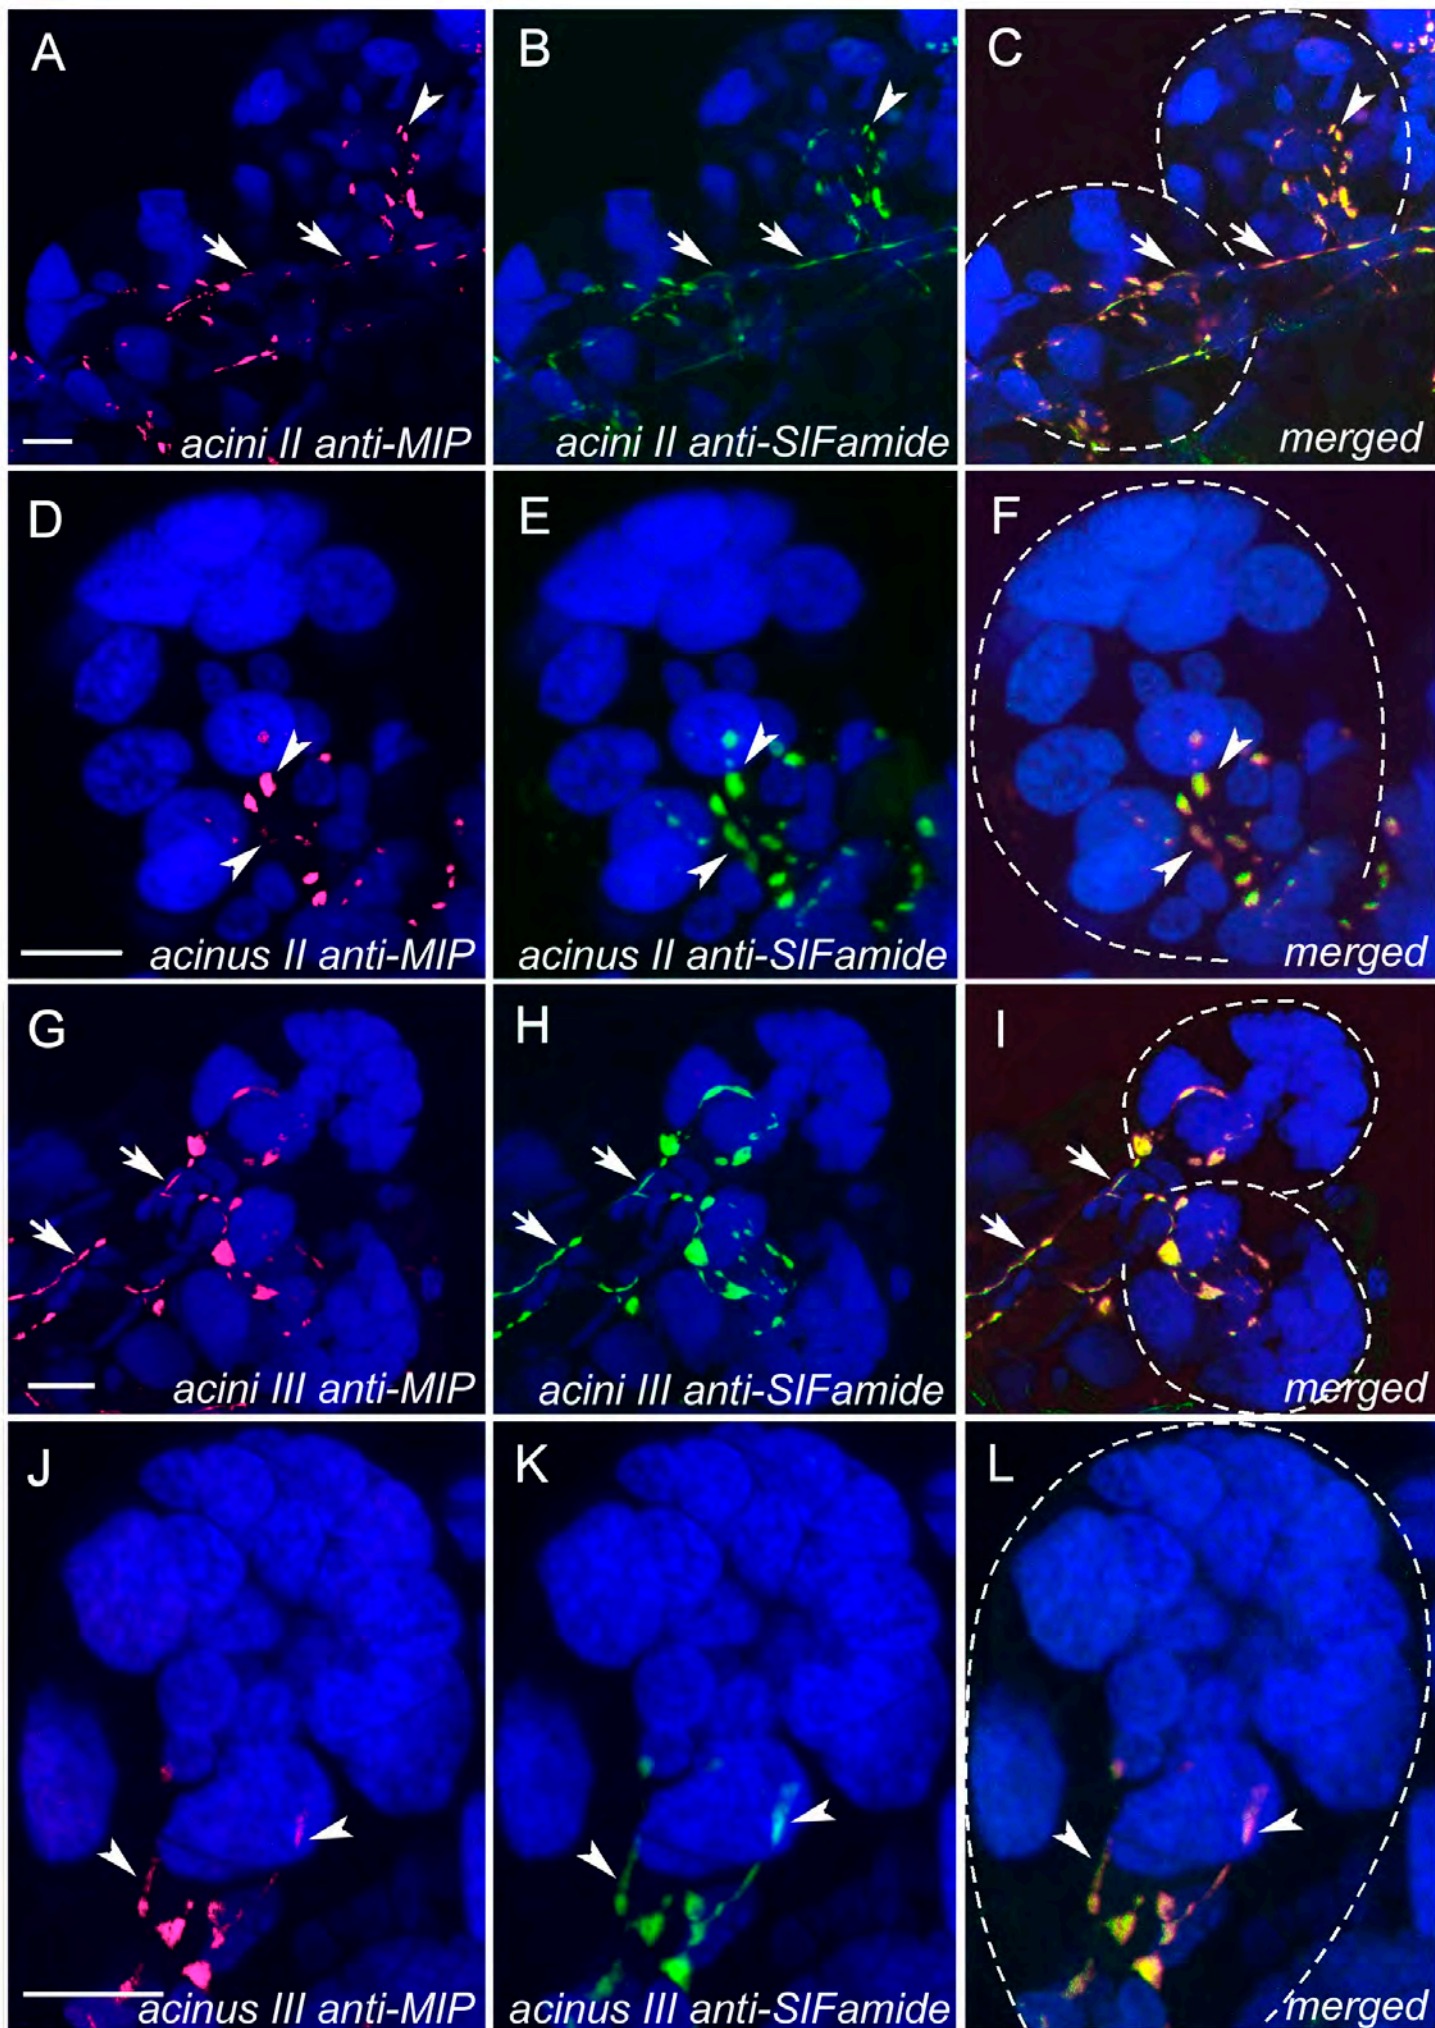

Supplement: NIHMS265506-supplement-SuppleFig1_and_2.pdf [file NIHMS265506-supplement-SuppleFig1_and_2.pdf]
